# Supplementary material for: Quantification of Cell Edge Velocities and Traction Forces Reveals Distinct Motility Modules during Cell Spreading
Source: PLoS One. 2008 Nov 17;3(11):e3735. doi: 10.1371/journal.pone.0003735 (PMC2581916; doi:10.1371/journal.pone.0003735)
Supplement: Appendix S1 — From an analysis of membrane edge velocities, we estimate the kinetic constants of actin polymerization as a function of Cytochalasin D. (0.05 MB DOC) [file pone.0003735.s001.doc]

## Appendix S1

From an analysis of membrane edge velocities, we can estimate the kinetic constants of actin polymerization as a function of additives. Neglecting geometrical and other factors of order one, we get for the number of added monomers per unit time

,

where *V*P1 = 3.2 mm/min is the typical edge velocity in the P1 phase, and *l*m  = 2 nm is the length of filament extension from one actin monomer. With the known bare rate constant kon=10 /(mM s), and assuming

,

this corresponds to c0= 26/s x 0.1 mM s = 2.6 mM for the actin monomer concentration at the leading edge.

With a linear dependence of the overall actin polymerization rate dN/dt on CD concentration *cCD*

we find the two constants *k0*= 26/s and *k1* = - 0.16 / (nM s) from a fit to the mean velocity *m2* versus CD concentration for P1. Note that it is important to disentangle the various contributions to the membrane velocity in order to obtain sensible rate constants. The rate constant k1 should be considered an effective quantity, since we didn´t measure cellular CD concentrations. Rather we used the concentration of externally added CD, which is likely to be larger than the intracellular concentration.
